# Supplementary material for: CD16 expression on neutrophils predicts treatment efficacy of capecitabine in colorectal cancer patients
Source: PubMed Central journal article supplement (PMC7414545; doi:10.1186/s12865-020-00375-8), 2020-08-08

Fig S2

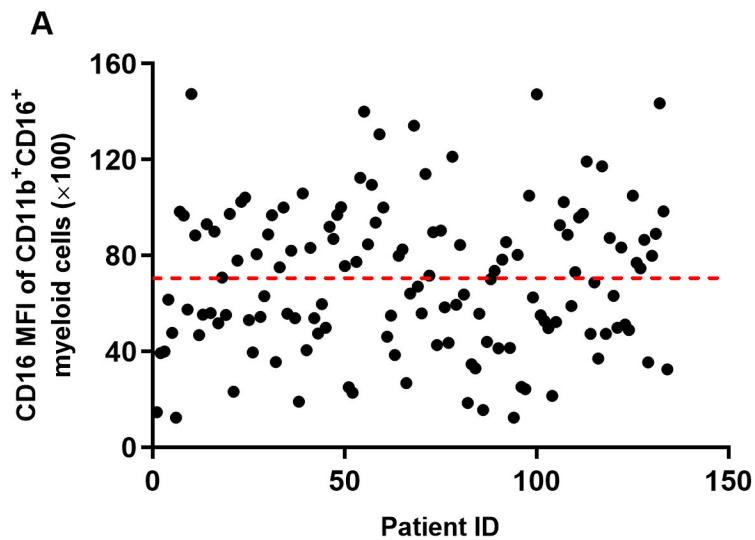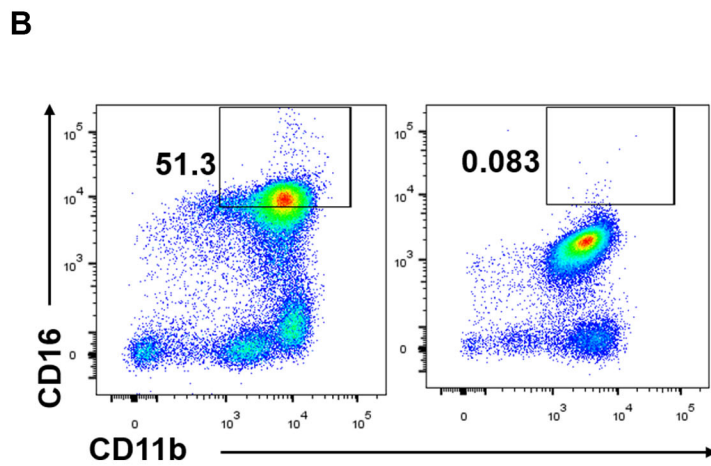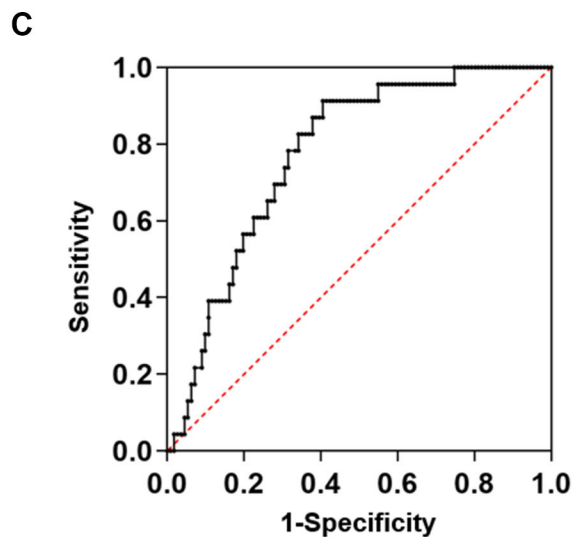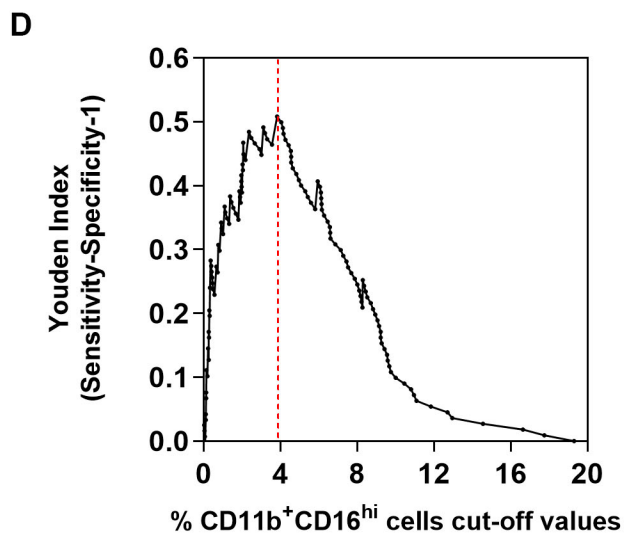

Supplement: 12865_2020_375_MOESM2_ESM.pdf [file 12865_2020_375_MOESM2_ESM.pdf]
