# Supplementary material for: CD16 expression on neutrophils predicts treatment efficacy of capecitabine in colorectal cancer patients
Source: PubMed Central journal article supplement (PMC7414545; doi:10.1186/s12865-020-00375-8), 2020-08-08

**Fig S3**

**A**

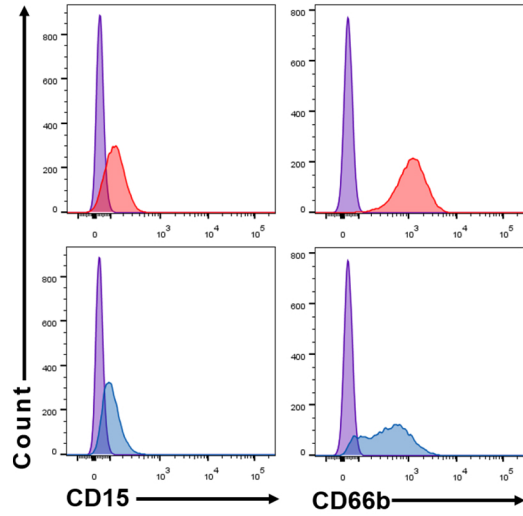

■ CD16<sup>+</sup> myeloid cells in sensitive CRC patient  
■ CD16<sup>+</sup> myeloid cells in resistant CRC patient  
■ Myeloid cells in CRC patients stained with mouse IgM isotype control

**B**

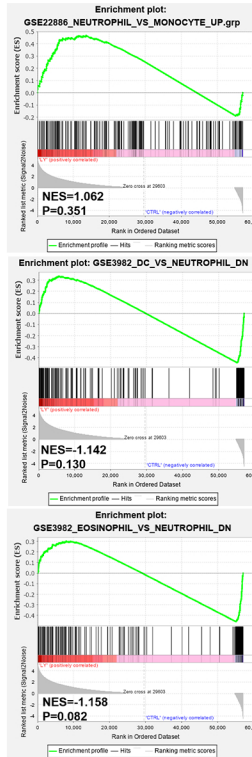

Supplement: 12865_2020_375_MOESM3_ESM.pdf [file 12865_2020_375_MOESM3_ESM.pdf]
