# Supplementary material for: CD16 expression on neutrophils predicts treatment efficacy of capecitabine in colorectal cancer patients
Source: PubMed Central journal article supplement (PMC7414545; doi:10.1186/s12865-020-00375-8), 2020-08-08
Supplement: 12865_2020_375_MOESM4_ESM.pdf [file 12865_2020_375_MOESM4_ESM.pdf]

**Table S1. Baseline characteristics of CRC patients in RNA sequencing.**

| Group                 | Number of Patients | Age | Sex | TNM Stage | Location | Diagnosis of Recurrence After Capecitabine Treatment |
|-----------------------|--------------------|-----|-----|-----------|----------|------------------------------------------------------|
| Resistant CRC patient | 1                  | 48  | F   | II        | Rectum   | Yes                                                  |
|                       | 2                  | 67  | M   | III       | Colon    | Yes                                                  |
| Sensitive CRC patient | 3                  | 55  | M   | II        | Rectum   | No                                                   |
|                       | 4                  | 61  | F   | II        | Colon    | No                                                   |
