# Supplementary material for: CD16 expression on neutrophils predicts treatment efficacy of capecitabine in colorectal cancer patients
Source: PubMed Central journal article supplement (PMC7414545; doi:10.1186/s12865-020-00375-8), 2020-08-08
Supplement: 12865_2020_375_MOESM5_ESM.pdf [file 12865_2020_375_MOESM5_ESM.pdf]

**Table S2. Gene set enrichment analysis of neutrophil signature.**

| GeneSet                                        | ES          | NES        | NOM p-val   | FDR q-val  | FWER p-val |
|------------------------------------------------|-------------|------------|-------------|------------|------------|
| GSE3982_DC_VS_NEUTROPHIL_DN                    | -0.44325554 | -1.1419026 | 0.13043478  | 0.7566767  | 0.95       |
| GSE3982_NEUTROPHIL_VS_BCELL_UP                 | -0.40136227 | -1.0971215 | 0.1594203   | 0.8070399  | 0.98       |
| GSE3982_NEUTROPHIL_VS_EFF_MEMORY_CD4_TCELL_UP  | -0.50342894 | -1.1381239 | 0.225       | 0.61691934 | 0.95       |
| GSE22886_NAIVE_CD4_TCELL_VS_NEUTROPHIL_DN      | -0.3980943  | -1.0637071 | 0.3148148   | 0.80499357 | 0.99       |
| GSE22886_NAIVE_CD8_TCELL_VS_NEUTROPHIL_DN      | -0.40389994 | -1.0748298 | 0.26229507  | 0.81070286 | 0.99       |
| GSE22886_NAIVE_TCELL_VS_NEUTROPHIL_DN          | -0.4247377  | -1.1394007 | 0.17857143  | 0.65468645 | 0.95       |
| GSE3982_DC_VS_NEUTROPHIL_LPS_STIM_DN           | -0.44123843 | -1.1699814 | 0.16666667  | 0.8963033  | 0.9        |
| GSE3982_EOSINOPHIL_VS_NEUTROPHIL_DN            | -0.45642194 | -1.1579776 | 0.08163265  | 0.7221987  | 0.92       |
| GSE3982_NEUTROPHIL_VS_CENT_MEMORY_CD4_TCELL_UP | -0.49643174 | -1.1614217 | 0.16666667  | 0.77029866 | 0.91       |
| GSE3982_NEUTROPHIL_VS_NKCELL_UP                | -0.4798183  | -1.1687933 | 0.1         | 0.7681386  | 0.9        |
| GSE3982_NEUTROPHIL_VS_TH1_UP                   | -0.43271157 | -1.1921971 | 0.06896552  | 0.66128355 | 0.87       |
| GSE3982_NEUTROPHIL_VS_TH2_UP                   | -0.45457745 | -1.196495  | 0.071428575 | 0.78912044 | 0.86       |
| GSE22886_NAIVE_BCELL_VS_NEUTROPHIL_DN          | -0.6152943  | -1.22062   | 0.17073171  | 0.64763665 | 0.84       |
| GSE22886_NEUTROPHIL_VS_MONOCYTE_UP             | 0.46898615  | 1.0624084  | 0.35135135  | 0.35135135 | 0.13       |
